# Supplementary material for: Rh(III) Aqueous Speciation with Chloride as a Driver for Its Extraction by Phosphonium Based Ionic Liquids
Source: PubMed Central journal article supplement (PMC6480558; doi:10.3390/molecules24071391), 2019-04-09
Supplement: molecules-24-01391-s001.pdf [file molecules-24-01391-s001.pdf]

Supplementary materials:

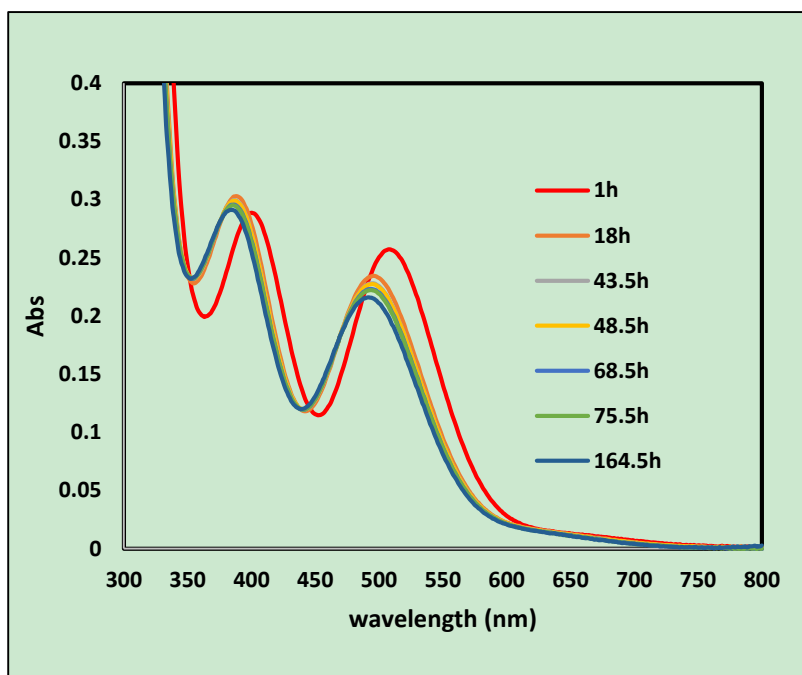

Fig. S1: UV-vis absorption of Rh(III) ( $2.4 \times 10^{-3}$  M) in  $\text{H}_2\text{O}/\text{HCl}$  0.5 M as a function of time after preparation.
